# Scoping Review of One-Dimension Statistical Parametric Mapping in Lower Limb Biomechanical Analysis

Tomer Yona<sup>1</sup>, Netanel Kamel<sup>2</sup>, Galia Cohen-Eick<sup>1</sup>, Inbar Ovadia<sup>3</sup>, Arielle Fischer<sup>1</sup>

<sup>1</sup> Department of Biomedical Engineering, Technion, Israel Institute of Technology, Haifa, Israel

<sup>2</sup> The Ruth and Bruce Rappaport Faculty of Medicine, Technion, Israel Institute of Technology, Haifa, Israel

<sup>3</sup> Department of Mechanical Engineering, Technion, Israel Institute of Technology, Haifa, Israel

## ABSTRACT

**Background:** Biomechanics is crucial in enhancing sports performance and preventing injury. Traditionally, discrete point analysis is used to analyze important kinetic and kinematic data points, reducing continuous data to a single point. One-dimensional Statistical Parametric Mapping (spm1d) offers a more comprehensive approach by assessing entire movement curves instead of isolated peak values. Nevertheless, spm1d is still underutilized in various sports and sports-related injuries.

**Purpose:** To summarize the existing literature on the application of spm1d in sports biomechanics, including the kinetics and kinematics of the hip, knee, and ankle joints, as well as to identify gaps in the literature that may require further research.

**Methods:** A scoping review was conducted, searching PubMed, Embase, Web of Science, and ProQuest databases. English peer-reviewed studies using SPM to assess lower limb kinetics or kinematics in different sports or sports-related injuries were included. In contrast, reviews, meta-analyses, conference abstracts, grey literature, and studies focusing on non-kinetic or kinematic outcomes were excluded.

**Results:** The review yielded 129 papers, with an increased number of studies published in the last three years. Of these studies, 81 examined healthy individuals (63%), and 48 focused on injured populations (37%). Running (n=28), cutting (n=21), and jumping/landing (n=14) were the most common activities. The most prevalent sport-related injuries examined were anterior cruciate ligament rupture (n=21), chronic ankle instability (n=16), and hip-related pain (n=9). Research gaps include the underrepresentation of common sports and movements, small sample size, lack of studies in non-laboratory settings and varied active age groups, and absence of evaluations on the effects of protective sports gear other than shoes.

**Conclusion:** The application of spm1d in sports biomechanics demonstrates diverse uses in sports performance, injury reduction, and rehabilitation. While spm1d shows promise in improving our understanding of sports biomechanics, there are still significant gaps in the literature that present future research opportunities.

**Keywords:** One-Dimensional Statistical Parametric Mapping, Lower Limb Biomechanics, Sports Medicine, Sports Injuries, Scoping Review.

## INTRODUCTION

From enhancing performance to preventing injury, biomechanics plays a pivotal role in the field of sports and sports-related injuries.<sup>1,2</sup> Traditionally, kinetics and kinematics are collected as continuous signals and analyzed using discrete point analysis, which reduces the data to isolated points, such as the minima and maxima of the signal. However, this approach may overlook important information within the continuous signal under analysis, such as the range of a joint's movement, ground reaction forces, and moments acting on a joint during different activities.

Statistical Parametric Mapping (SPM) has been widely used in neuroimaging as it allows us to see changes across the entire brain, not just in specific areas.<sup>3</sup> This approach has advantages over simpler, point-by-point methods, which might miss these widespread changes. Pataky (2010)<sup>4</sup> introduced one-dimensional statistical parametric mapping (spm1d) as a method for biomechanical analysis, enabling the assessment of entire movement curves for statistical significance. By employing spm1d, researchers can gain a more comprehensive understanding of movement biomechanics instead of solely focusing on the peak values of specific movements.

This review focuses on the biomechanics of the lower limbs due to their crucial role in most sports activities and their susceptibility to injury. Through the application of spm1d, researchers can analyze simple and complex movements of the hip, knee, and ankle joints, identifying subtle patterns that may not be evident through traditional discrete point analysis. This improved understanding can lead to enhanced performance, effective treatment approaches for sports injuries, precise strength and conditioning programs, and improved rehabilitation strategies. Furthermore, it can improve the development and design of sports equipment and protective gear.

Given the early stages of spm1d in biomechanics, this scoping review offers a unique opportunity to uncover research trajectories and address knowledge gaps. Unlike systematic reviews focusing on synthesizing conclusive evidence for specific questions, scoping reviews are better suited for exploring broad research areas.

Through this scoping review, we aim to examine the existing literature in sports medicine and sports biomechanics utilizing spm1d, describe the studies characteristics, identify knowledge gaps, and propose future research directions. This approach is particularly suitable given the wide-ranging applications of spm1d in biomechanics.<sup>5</sup> Specifically, our focus will be on the lower limbs, including the kinetics and kinematics of the hip, knee, and ankle joints.

## METHODS

To comprehensively review the applications of SPM in biomechanics, we conducted a scoping review of the literature. We performed a search in PubMed, Embase, Web of Science, and ProQuest, with the following search string: “(((knee) OR (hip)) OR (ankle)) AND (statistical parametric mapping)”. The specific search strategy for each database is detailed in Appendix 1.

We included peer-reviewed studies written in English that utilized spm1d as the main outcome to assess lower limb kinetics or kinematics in different sports or common sports injuries. Studies comparing different measurement tools or assessing electromyography as the primary outcome were excluded. Additionally, studies unrelated to sports or sport-related injuries were excluded, along with reviews, meta-analyses, conference abstracts, and grey literature. There were no restrictions on the publication date. The database search was conducted in March 2023.

Two authors independently screened the titles and abstracts of the identified papers using the Rayyan online system.<sup>6</sup> Subsequently, using a custom-written Excel file, two authors independently reviewed the full text of the included studies and extracted the following information from each study: Study design, number of participants, population (healthy/injured), sport played by the participants, activity and joints assessed in the study, measurement tools, and outcome measures. Any discrepancies were solved through discussion. Before commencing the review, all the authors piloted the system and the screening process and established a consensus.

This study adheres to the PRISMA Extension for Scoping Reviews (PRISMA-ScR) Checklist.<sup>7</sup> The protocol for this study was registered in the Open Science Framework before initiating the review and is available online.<sup>8</sup>

## RESULTS

The initial search identified 1305 records. After removing duplicates, 531 papers underwent title and abstract screening. Subsequently, the full text of 132 studies was screened, resulting in one study being excluded due to a wrong primary outcome, one due to the wrong population, and one not available to the authors (Figure 1). Finally, 129 papers were included in this review, with over half published in the last three years (Figure 2). Most studies assessed healthy populations (n=91), and 51 involved injured participants. The median number of participants in the studies among healthy participants was 19 [9-90], and the median among injured participants was 27.5 [9-357].

### Running

A total of 28 studies assessed running, 13 involving treadmill running and 15 surface running. Among these studies, ten focused on the effects of different shoes on running biomechanics<sup>9-18</sup>, three studies examined specific physical interventions<sup>19-21</sup>, three studies assessed various gait modifications<sup>22-24</sup>, three evaluated foot biomechanics<sup>25-27</sup>, two explored the effects of fatigue<sup>28,29</sup>, and two investigated studies the effects of sex<sup>30,31</sup>. Additionally, single studies examined the effects of different surfaces<sup>32</sup>, hamstring flexibility<sup>33</sup>, perturbations<sup>34</sup>, running with different loads<sup>35</sup>, and the differences between transition running and isolated running in triathlon<sup>36</sup> (Table 1). The median number of participants was 17.5 [9-87].

### Cutting

A total of 21 studies assessed cutting/change of direction activities. Among them, five studies evaluated the effect of foot-strike and movement patterns on cutting maneuvers<sup>37-41</sup>, four focused on the influence of anticipation and uncertainty<sup>42-45</sup>, four assessed the influence of external factors such as fatigue<sup>46,47</sup>, footwear<sup>48</sup> and surface<sup>49</sup>, and two looked at the influence of training and movement strategies<sup>50,51</sup>. Single studies evaluated the effects of sex<sup>52</sup>, speed<sup>53</sup>, lab versus field<sup>54</sup>, limb differences<sup>55</sup>, cutting on a softball base

compared to a flat surface<sup>56</sup>, and the joint contact forces of the medial versus the lateral tibiofemoral joint<sup>57</sup> (Table 2). The median number of participants was 24 [12-50].

### **Jumping and Landing**

Fourteen studies investigated jumping or landing tasks. Among these, four examined single-leg vs. double-leg landings and landings direction<sup>58-61</sup>, and two evaluated the effects of different interventions: the effects of a video task on volleyball jump<sup>62</sup>, and the effects of a new shoe on drop-landing<sup>63</sup>. Two studies explored the effects of limb dominance<sup>64,65</sup>, and another two explored the difference between males and females<sup>31,52</sup>. Single studies investigated the effects of fatigue<sup>47</sup>, anticipation<sup>66</sup>, different foot areas during landing<sup>67</sup>, and different landing biomechanics among different jumping athletes<sup>68</sup> (Table 3). The median number of participants was 20 [9-90].

### **Squatting**

Six studies focused on squatting, with five assessing the traditional back squat<sup>69-73</sup>. One study examined a lunge squat<sup>74</sup>, and one evaluated a half squat<sup>69</sup>. Three studies investigated different load conditions<sup>70,74,73</sup>, squat depth<sup>69</sup>, and heel height<sup>72</sup> on the biomechanics of the lower limbs. Additionally, one study evaluated the inter-individual and intra-individual variability during a squat<sup>71</sup> (Table 4). The median number of participants was 15 [9-20].

### **Isokinetic**

Three studies assessed the quadriceps or hamstrings muscle force curve produced by an isokinetic machine; They examined the influence of fatigue<sup>75</sup> and sex<sup>76</sup> on force production, as well as the kinetics and kinematics of eccentric, quasi-isometric loading<sup>77</sup> (Table 4). The median number of participants was 17 [14-28].

### **Other Activities**

A total of 12 studies assessed other sports activities. Three studies focused on different aspects of cycling: the first examined the impact of fatigue<sup>78</sup>, the second investigated the influence of saddle height<sup>79</sup>, and the third evaluated the biomechanical implications of crank length<sup>80</sup>. Three studies evaluated kicking; The first study compared the differences between male and female soccer players<sup>81</sup>. The second study examined the effects

of technique refinement intervention on soccer kick performance<sup>82</sup>. The third study describes the biomechanical differences between rugby kickers with performance outcomes<sup>83</sup>.

Two studies were conducted on kayaking: The first evaluated the effects of fatigue on kayaking<sup>84</sup>, while the second compared on-ergometer and on-water kayaking movements<sup>85</sup>.

Lastly, one study evaluated sex differences in hurdling<sup>86</sup>, while another investigated how the duration of a cricket match impacts lower limb biomechanics<sup>87</sup>. Additional study explored the correlations between the hip-ankle and knee-ankle movements during Irish dancing<sup>88</sup>. Another study assessed how different types of unanticipated stimuli affect the biomechanics of sidestepping<sup>89</sup> (Table 4). The median number of participants was 12 [9-33].

### **Anterior Cruciate Ligament Injuries**

A total of 21 studies analyzed the movements of individuals after an ACL injury. Two studies assessed walking on a treadmill<sup>90,91</sup>, one assessed walking overground<sup>92</sup>, and two evaluated the effects of functional resistance training on gait asymmetries.<sup>93,94</sup> Two studies assessed stairs ambulation: one assessed stairs descent and the other ascent. Both studies used a custom-built 3-step staircase.<sup>95,92</sup>

Six studies looked at different jumping/landing activities, including two that assessed the effects of a knee sleeve on jumping and landing biomechanics<sup>96,97</sup>, one that assessed the effect of fatigue<sup>98</sup>, and three that reported on between-limb differences.<sup>99-101</sup> Lastly, three studies evaluated cutting activities.<sup>102,103,101</sup> Additional seven studies have used isokinetic devices to evaluate the isokinetic strength of the quadriceps and hamstrings<sup>104-110</sup> (Table 5). The median number of participants was 30 [12-357].

### **Ankle Injuries**

Sixteen Studies evaluated people with chronic ankle instability (CAI). Three studies assessed overground walking<sup>111-113</sup>, two assessed treadmill walking<sup>114,115</sup>, and one study examined the effects of taping on the foot and ankle biomechanics.<sup>116</sup> Additionally, five studies focused on running biomechanics, with three being observational studies<sup>117,118,111</sup> and two evaluating the effects of taping.<sup>119,120</sup> Furthermore, five studies evaluated jumping/landing activities, with two assessing the effects of taping on the ankle and foot<sup>121,122</sup>, and

three being observational.<sup>123–125</sup> Lastly, a single study examined the kinematics of cutting<sup>126</sup> (Table 6). The median number of participants was 19.5 [13-66].

### **Hip Related Pain**

Nine studies examined people with hip related pain. Among these studies, two<sup>127,128</sup> focused on overground walking, and one assessed walking on a treadmill.<sup>129</sup> Another two studies investigated the effects of exercise programs on walking biomechanics<sup>130,131</sup>. Furthermore, one study examined overground running<sup>132</sup>, while another explored stair ambulation before and after hip osteochondroplasty and labral-chondral debridement<sup>133</sup>. In addition, two studies assessed jumping/landing activities<sup>134,127</sup>, and two additional studies evaluated the biomechanics of squatting. One of these studies was observational<sup>135</sup>, while the other assessed the effects of a targeted exercise program<sup>130</sup> (Table 7). The median number of participants was 36 [9-88].

### **Other Sport-Related Injuries**

Three studies assessed other sport-related injuries. One investigated the effects of patellofemoral pain during squatting and walking overground<sup>136</sup>. Additional two studies evaluated the impact of a hamstring injury on strength using an isokinetic device.<sup>104,137</sup> (Appendix 2). The median number of participants for the above studies was 31 [25-56].

## **DISCUSSION**

Our systematic scoping review aimed to provide an overview of the sports and sport-injuries literature regarding using spm1d in lower limb biomechanics and identify possible research gaps. Our review identified 129 studies, 76 (59%) published in the last three years. Among the included studies, 81 (63%) focused on healthy individuals, while 41 (37%) examined injured individuals. Additionally, we found that while specific movements and sports are common in the spm1d literature, others are considerably lacking. Additionally, the median sample size of the studies was low. Next, most studies were conducted only in a laboratory setting and on young adults, ignoring other active age groups. Lastly, while some studies assessed the effects of different shoes, we found no studies assessing any protective gear.



The increasing use of sPM1d over the last three years suggests a growing recognition of this method's potential in sports biomechanics. However, the relatively low number of papers utilizing sPM1d also indicated existing knowledge gaps. Furthermore, there is a lack of standardization of reporting sPM1d only or together with discrete analysis; This could be attributed to researchers' limited familiarity with sPM1d and the requirement of basic coding skills, as sPM1d is primarily used with MATLAB or Python.

Furthermore, the median sample size of the studies included in the analysis was relatively low, with 19 for studies involving healthy participants and 28 for studies among injured populations. It is important to note that sPM1d analysis typically requires a larger sample size than discrete analysis. Consequently, many studies using sPM1d may be underpowered and susceptible to type II errors (false negatives).<sup>138</sup> In 2017, Pataky et al. introduced a tool to estimate the sample size for sPM1d studies, but none of the studies in this review used it to calculate their sample size.<sup>139</sup> This lack of methodological consistency may impact the comparability of study outcomes. To address these challenges, it is crucial to disseminate knowledge about the applications of sPM1d and provide coding training to researchers within the sports science community. By increasing familiarity and understanding of sPM1d's capabilities, its adoption, and utilization are likely to broaden, leading to improved study design and more robust research findings in sports biomechanics.

Our findings revealed a diverse range of movements investigated using sPM1d, both in healthy and injured populations. However, the utilization of sPM1d varied across different movements and sports. Running, cutting, jumping/landing, and squatting were the most commonly examined activities among healthy participants, while running, soccer, and handball were the most frequently studied sports. This discrepancy highlights the need to explore other areas that have received less attention.

Most studies were conducted in controlled laboratory environments, leading to low ecological validity and may not fully replicate real-world conditions. With the emergence of wearable technologies, such as smart clothing, inertial sensing, and fitness trackers, researchers have the opportunity to extend the scope of applications to various sports and activities, incorporating more realistic conditions to represent real-world environments.

Additionally, our review underscored the imbalance between studies on healthy populations and those involving injured individuals. Future research on injured people could provide valuable insights into injury mechanisms, prevention, and rehabilitation strategies. While studies on ACL injuries, CAI, and hip-related pain were relatively common, other types of injuries, such as patellofemoral pain syndrome and hamstring injuries, common among athletes, have received less attention within the spm1d framework. Broadening the scope of research to encompass a broader range of injuries would enhance the utility of spm1d in sports medicine.

The included studies predominantly focused on adult populations, leaving gaps in our understanding of active pediatrics and older adults. Moreover, most of the studies did not focus specifically on gender. Considering the unique biomechanical profiles of different demographic and age groups, future studies should strive for inclusivity and account for these differences in their analyses. By extending the use of spm1d to these populations, our understanding of lower limb biomechanics across genders and the lifespan can be enriched.

While many studies in our review concentrated on footwear design and development, broader use of spm1d can inform sports equipment design and protective gear development. Evaluating the impact of different shoes, clothing, and protective gear on sports biomechanics can assist manufacturers in optimizing their designs for enhanced performance and injury prevention.

Several limitations should be considered in our study. Firstly, to make it more feasible, we have only included studies that evaluated lower limb movements in common sports injuries and sports activities. Secondly, we focused exclusively on English and peer-reviewed studies. Lastly, our review was limited to publications in peer-reviewed journals, potentially overlooking relevant works in grey literature.

## CONCLUSIONS

Our scoping review indicates a growing use of spm1d in sports biomechanics, particularly in assessing lower limb movements such as running, cutting, jumping, and squatting, as well as in conditions such as ACL injuries, CAI, and hip-related pain. A knowledge gap remains in underrepresented sports movements and diverse demographic groups.

**Figure 1. PRISMA flow diagram**

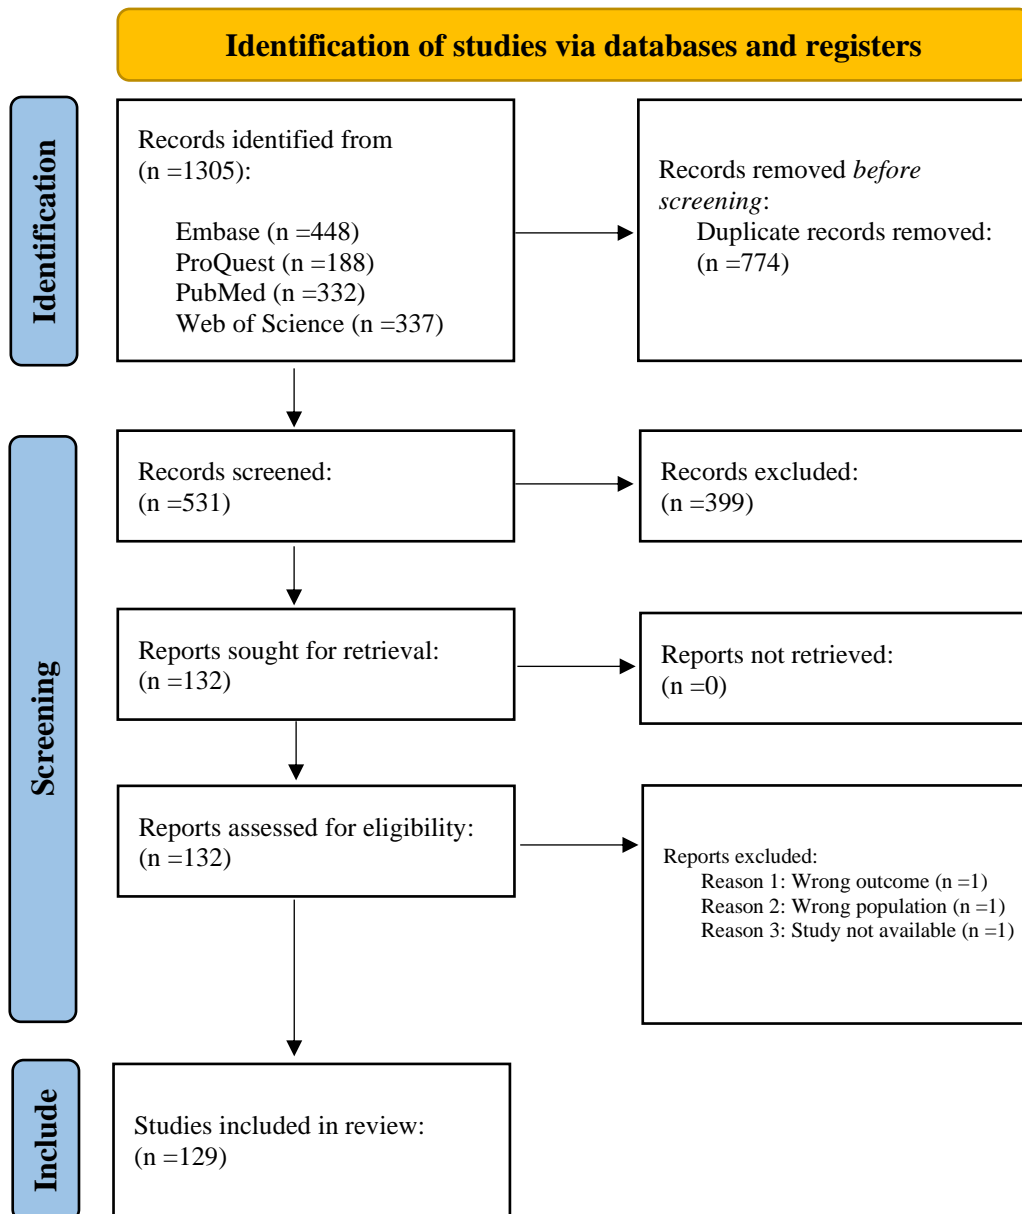

**Figure 2. Number of Studies Utilizing spm1d for lower limb biomechanics Published per Year**

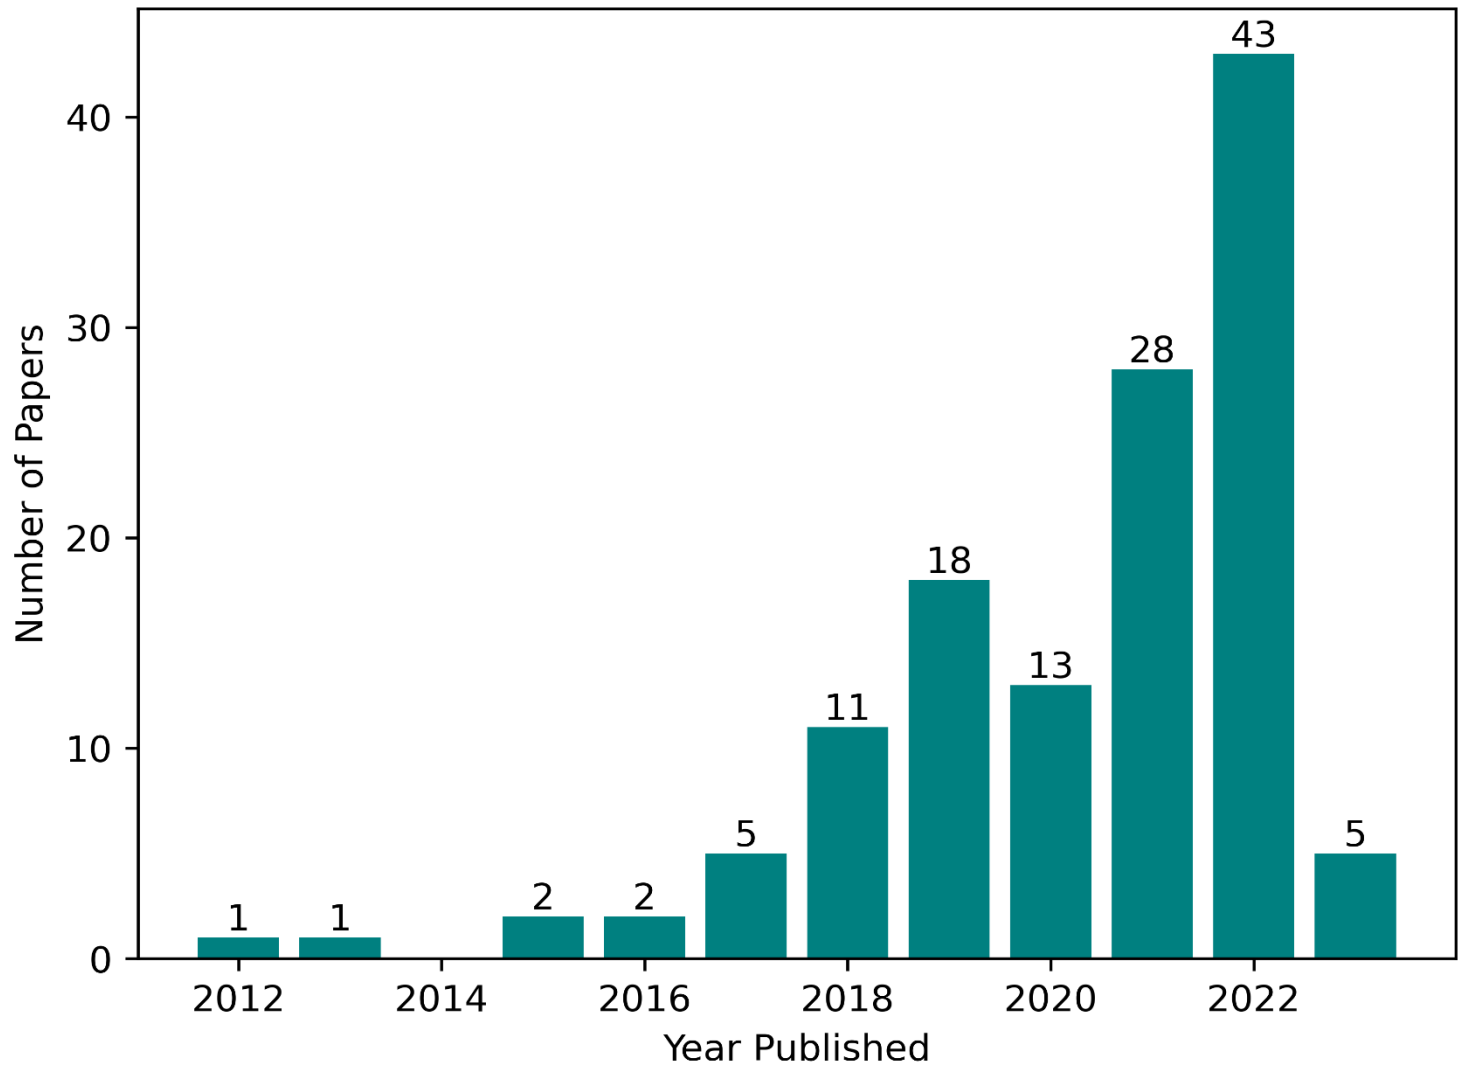

**Table 1. SPM1d in Assessing Running Activities**

| Participants Details             |                        |                       |                     | SPM Assessment       |                           |                       |               |
|----------------------------------|------------------------|-----------------------|---------------------|----------------------|---------------------------|-----------------------|---------------|
| Study                            | Number Of Participants | Sport participation   | Activity            | Joints               | Measurement Tools         | Kinetic/ Kinematic    | SPM/ Discreet |
| Shamsoddini (2022) <sup>14</sup> | 17                     | Physically active     | Running             | Hip, Knee, Ankle     | Qualisys + Kistler        | Kinematics + Kinetics | SPM           |
| Zhang (2022) <sup>18</sup>       | 13                     | Running               | Running             | Pelvis, Hip, Knee    | Motion Analysis + Kistler | Kinematics + Kinetics | SPM+ Discreet |
| Chen (2022) <sup>10</sup>        | 10                     | Running               | Running             | Hip, Knee, Ankle     | Vicon + AMTI              | Kinematics + Kinetics | SPM+ Discreet |
| Fu (2022) <sup>12</sup>          | 15                     | Running               | Running             | Hip, Knee, Ankle     | Vicon + AMTI              | Kinematics + Kinetics | SPM+ Discreet |
| Besson (2019) <sup>11</sup>      | 15                     | Running               | Running             | Hip, Knee, Ankle     | Motion Analysis + Kistler | Kinematics + Kinetics | SPM+ Discreet |
| Sinclair (2018) <sup>16</sup>    | 15                     | Running               | Running             | Knee                 | Qualisys + Kistler        | Kinetics              | SPM           |
| Tam (2017) <sup>17</sup>         | 50                     | Running               | Running             | Knee, Ankle          | Vicon + AMTI              | Kinematics + Kinetics | SPM           |
| Sinclair (2021) <sup>15</sup>    | 13                     | Running               | Running             | Hip, Knee, Ankle     | Qualisys + Kistler        | Kinematics + Kinetics | SPM           |
| Costa (2021) <sup>9</sup>        | 16                     | Running               | Running- Treadmill  | Hip, Knee, Ankle     | Qualisys + Bertec         | Kinematics + Kinetics | SPM+ Discreet |
| Nüesch (2019) <sup>13</sup>      | 19                     | Running               | Running- Treadmill  | Hip, Knee, Ankle     | RehaGait + Zebris         | Kinematics + Kinetics | SPM           |
| Nishida (2022) <sup>31</sup>     | 19                     | Collegiate athletes   | Running- Treadmill  | Knee                 | XRAY + Bertec             | Kinematics            | SPM+ Discreet |
| Takabayashi (2019) <sup>30</sup> | 22                     | Running, Jogging      | Running- Treadmill  | Ankle                | Vicon                     | Kinematics            | SPM           |
| Gao (2022) <sup>29</sup>         | 18                     | Running               | Running- Treadmill  | Hip, Knee, Ankle     | Vicon + Kistler           | Kinematics            | SPM           |
| Möhler (2022) <sup>28</sup>      | 14                     | Running               | Running- Treadmill  | Hip, Knee, Ankle, CM | Vicon                     | Kinematics            | SPM+ Discreet |
| Matias (2022) <sup>21</sup>      | 87                     | Running               | Running- Treadmill  | Ankle, foot          | Vicon + AMTI              | Kinematics            | SPM           |
| Trowell (2022) <sup>19</sup>     | 28                     | Running               | Running- Treadmill  | Hip, Knee, Ankle     | Vicon + Kistler           | Kinematics + Kinetics | SPM+ Discreet |
| Masters (2018) <sup>20</sup>     | 23                     | Running               | Running             | Hip, Knee            | Vicon + AMTI              | Kinematics            | SPM+ Discreet |
| Bennett (2021) <sup>23</sup>     | 19                     | Running               | Running             | Hip, Knee, Ankle     | Qualisys + AMTI           | Kinetics              | SPM           |
| Alizadeh (2019) <sup>22</sup>    | 34                     | Soccer                | Running - Treadmill | Hip, Knee            | Vicon, Diers Formetric 4D | Kinematics            | SPM+ Discreet |
| Mei (2019) <sup>24</sup>         | 20                     | Running               | Running- Treadmill  | Hip, Knee, Ankle     | Vicon, Diers Formetric 4D | Kinematics + Kinetics | SPM+ Discreet |
| Deschamps (2022) <sup>25</sup>   | 12                     | Recreationally active | Running             | Ankle                | Vicon + AMTI              | Kinematics + Kinetics | SPM           |
| Glassbrook (2020) <sup>26</sup>  | 16                     | Recreationally active | Running- Treadmill  | Ankle                | iMeasureU                 | Kinematics            | SPM+ Discreet |
| Judson (2019) <sup>27</sup>      | 9                      | Running, Sprint       | Sprint              | Foot                 | Motion Analysis + Kistler | Kinetics              | SPM           |
| Zhou (2023) <sup>32</sup>        | 30                     | Running               | Running             | Hip, Knee, Ankle     | Vicon + Kistler           | Kinematics + Kinetics | SPM           |
| Garcia (2022) <sup>33</sup>      | 34                     | Running               | Running- Treadmill  | Pelvis, Hip, Knee    | Motion Analysis           | Kinematics            | SPM+ Discreet |
| Khajooei (2022) <sup>34</sup>    | 13                     | Running               | Running- Treadmill  | Hip, Knee, Ankle     | Vicon                     | Kinematics            | SPM           |
| Fraeulin (2021) <sup>36</sup>    | 16                     | Running, Triathlon    | Running             | Hip, Knee, Ankle     | XSENS                     | Kinematics            | SPM+ Discreet |
| Liew (2016) <sup>35</sup>        | 31                     | Running               | Running             | Hip, Knee, Ankle     | Vicon + AMTI              | Kinematics + Kinetics | SPM           |

**Table 2. SPM1d in Assessing Cutting Activities**

| Participants Details               |                        |                                 |                     | SPM Assessment   |                           |                       |               |
|------------------------------------|------------------------|---------------------------------|---------------------|------------------|---------------------------|-----------------------|---------------|
| Study                              | Number Of Participants | Sport participation             | Activity            | Joints           | Measurement Tools         | Kinetic/ Kinematic    | SPM/ Discreet |
| Uno (2022) <sup>37</sup>           | 23                     | Team sport                      | Cutting             | Knee, GRF, CM    | OptiTrack + AMTI          | Kinematics + Kinetics | SPM           |
| Ogasawara (2021) <sup>39</sup>     | 25                     | Handball                        | Cutting             | Hip, Knee        | OptiTrack + Kistler       | Kinematics + Kinetics | SPM+ Discreet |
| Ogasawara (2020) <sup>38</sup>     | 24                     | Handball                        | Cutting             | Knee, Ankle      | OptiTrack + Kistler       | Kinematics + Kinetics | SPM           |
| Peel (2022) <sup>40</sup>          | 24                     | Recreationally active           | Cutting             | Knee, Ankle      | Vicon + AMTI              | Kinematics + Kinetics | SPM+ Discreet |
| David (2017) <sup>41</sup>         | 50                     | N/A                             | Cutting             | Knee             | Vicon + Kistler           | Kinematics + Kinetics | SPM+ Discreet |
| Whyte (2018) <sup>44</sup>         | 28                     | Gaelic football                 | Cutting             | Hip, Knee, Ankle | Vicon + AMTI              | Kinematics + Kinetics | SPM           |
| Whyte (2018) <sup>45</sup>         | 28                     | Gaelic football                 | Side Cutting        | Hip, Knee, Ankle | Vicon + AMTI              | Kinematics + Kinetics | SPM           |
| Bedo (2021) <sup>42</sup>          | 31                     | Handball                        | Change of direction | Knee             | Vicon + AMTI              | Kinematics + Kinetics | SPM+ Discreet |
| Dutailis (2021) <sup>43</sup>      | 19                     | Recreationally active           | Sidestep cutting    | Hip, Knee, Ankle | Vicon + AMTI              | Kinematics + Kinetics | SPM           |
| Schroeder (2021) <sup>56</sup>     | 16                     | Softball                        | Change of direction | Hip, Knee, Ankle | Vicon + AMTI              | Kinematics + Kinetics | SPM+ Discreet |
| Cassiolas (2022) <sup>57</sup>     | 31                     | Recreational and elite athletes | Change of direction | Knee             | Vicon + AMTI              | Kinematics + Kinetics | SPM+ Discreet |
| Thomas (2022) <sup>55</sup>        | 14                     | Soccer                          | Change of direction | Hip, Knee, Ankle | Qualisys + AMTI           | Kinematics + Kinetics | SPM           |
| Di Paolo (2023) <sup>54</sup>      | 28                     | Soccer                          | Cutting             | Hip, Knee, Ankle | XSENS                     | Kinematics + Kinetics | SPM           |
| Whyte (2018) <sup>51</sup>         | 31                     | Soccer                          | Cutting             | Hip, Knee, Ankle | Vicon + AMTI              | Kinematics + Kinetics | SPM           |
| Sankey (2020) <sup>50</sup>        | 20                     | Soccer                          | Side cutting        | Hip, Knee, Ankle | Vicon + Kistler           | Kinematics + Kinetics | SPM           |
| Zago (2021) <sup>46</sup>          | 20                     | Soccer                          | Change of direction | Hip, Knee, Ankle | BTS Bioengineering + AMTI | Kinematics + Kinetics | SPM+ Discreet |
| Sinclair (2020) <sup>49</sup>      | 20                     | Recreational athletes           | Change of direction | Knee             | Qualisys + Kistler        | Kinematics + Kinetics | SPM+ Discreet |
| Bedo (2022) <sup>47</sup>          | 20                     | Handball                        | Side Cutting        | Hip, Knee        | Vicon + Bertec            | Kinematics + Kinetics | SPM           |
| Liu (2022) <sup>48</sup>           | 12                     | Basketball                      | Cutting             | Ankle            | Vicon + AMTI              | Kinematics + Kinetics | SPM           |
| Vanrenterghem (2012) <sup>53</sup> | 14                     | Dynamic sporting activity       | Cutting             | Knee             | Qualisys + Kistler        | Kinematics + Kinetics | SPM+ Discreet |
| Weinhandl (2021) <sup>52</sup>     | 38                     | Recreationally active           | Cutting             | Hip, GRF         | Vicon + Bertec            | Kinematics + Kinetics | SPM           |

**Table 3. SPM1d in Assessing Jumping and Landing Activities**

| Study                          | Participants Details   |                       |                                        | SPM Assessment    |                               |                       |               |
|--------------------------------|------------------------|-----------------------|----------------------------------------|-------------------|-------------------------------|-----------------------|---------------|
|                                | Number Of Participants | Sport participation   | Activity                               | Joints            | Measurement Tools             | Kinetic/ Kinematic    | SPM/ Discreet |
| Nishida (2022) <sup>31</sup>   | 19                     | Collegiate athletes   | Drop jump, single-leg hop              | Knee              | Radiograph+ Bertec            | Kinematics            | SPM           |
| Weinhandl (2021) <sup>52</sup> | 38                     | Recreationally active | Single leg drop-landing, land-and-cut  | Hip, GRF          | Vicon + Bertec                | Kinematics + Kinetics | SPM           |
| Xu (2020) <sup>59</sup>        | 45                     | Amateur athletes      | Forward and backward jump-landing      | Hip, Knee, Ankle  | Vicon + AMTI                  | Kinematics + Kinetics | SPM+ Discreet |
| Xu (2021) <sup>58</sup>        | 12                     | Volleyball            | Spike landing                          | Hip, Knee, Ankle  | Vicon + AMTI                  | Kinematics + Kinetics | SPM+ Discreet |
| Hogg (2020) <sup>61</sup>      | 90                     | N/A                   | Single and double-leg forward landings | Hip, Knee         | Impulse, Phase Space + Bertec | Kinematics            | SPM+ Discreet |
| Kunugi (2020) <sup>60</sup>    | 49                     | Soccer                | Single-leg landing                     | Hip, Knee, Ankle  | OptiTrack + Kistler           | Kinematics + Kinetics | SPM+ Discreet |
| Zhou (2021) <sup>63</sup>      | 15                     | Amateur athletes      | Single leg drop-landing                | Hip, Knee, Ankle  | Vicon                         | Kinematics + Kinetics | SPM+ Discreet |
| Liu (2021) <sup>62</sup>       | 15                     | Volleyball            | Volleyball spike jumps                 | Knee              | Vicon + AMTI                  | Kinematics + Kinetics |               |
| Zhou (2021) <sup>67</sup>      | 25                     | Basketball            | Stop-jump                              | Hip, Knee, Ankle  | Vicon + Kistler               | Kinematics + Kinetics | SPM           |
| Estevan (2020) <sup>68</sup>   | 30                     | Volleyball, gymnastic | Single-leg landing                     | Hip, Knee, Ankle  | Qualisys + Kistler            | Kinematics + Kinetics | SPM           |
| Martonick (2022) <sup>65</sup> | 9                      | N/A                   | Single leg drop-landing                | Pelvis, Hip, Knee | Vicon + AMTI                  | Kinematics            | SPM+ Discreet |
| Simpson (2019) <sup>66</sup>   | 15                     | Physically active     | Landing                                | Ankle             | Vicon + AMTI                  | Kinematics + Kinetics | SPM           |
| Whyte (2018) <sup>64</sup>     | 14                     | Varied                | Vertical drop jump                     | Hip, Knee, Ankle  | Vicon + AMTI                  | Kinematics + Kinetics | SPM           |
| Bedo (2022) <sup>47</sup>      | 20                     | Handball              | Single-leg landing, drop vertical jump | Hip, Knee         | Vicon + Bertec                | Kinematics            | SPM           |

**Table 4. SPM1d in Squatting, Isokinetic and Other Activities**

| Study                                 | Participants Details   |                           |                   | Joints               | SPM Assessment              |                       |                  |
|---------------------------------------|------------------------|---------------------------|-------------------|----------------------|-----------------------------|-----------------------|------------------|
|                                       | Number Of Participants | Sport participation       | Activity          |                      | Measurement Tools           | Kinetic/ Kinematic    | SPM/ Discreet    |
| Kipp (2022) <sup>70</sup>             | 9                      | Track and field athletes  | Squat             | Hip, Knee, Ankle     | Vicon + AMTI                | Kinematics + Kinetics | SPM              |
| Maddox (2021) <sup>73</sup>           | 20                     | Resistance-trained        | Squat             | Hip, Knee, Ankle     | Vicon + Bertec              | Kinematics + Kinetics | SPM+ Discreet    |
| Gao (2022) <sup>74</sup>              | 14                     | Squat                     | Lunge Squat       | Hip, Knee, Ankle     | Vicon + Kistler             | Kinematics + Kinetics | SPM, 2-Way Anova |
| Li (2021) <sup>69</sup>               | 16                     | Squat                     | Squat, half-squat | Hip, Knee, Ankle     | Vicon + AMTI                | Kinematics + Kinetics | SPM+ Discreet    |
| Sayers (2020) <sup>72</sup>           | 20                     | Resistance-trained        | Squat             | Hip, Knee, Ankle     | Vicon + Kistler             | Kinematics + Kinetics | SPM+ Discreet    |
| Kristiansen (2019) <sup>71</sup>      | 10                     | Resistance-trained        | Squat             | Hip, Knee, Ankle     | Qualisys                    | Kinematics            | SPM+ Discreet    |
| Alhammoud (2019) <sup>76</sup>        | 28                     | Other, Ski                | Isokinetic device | Knee                 | CSMi                        | Kinetics              | SPM, Discreet    |
| Oranchuk (2021) <sup>77</sup>         | 14                     | Resistance-trained        | Isokinetic device | Knee                 | CSMi                        | Kinetics              | SPM, Discreet    |
| Zhang (2021) <sup>75</sup>            | 17                     | Soccer                    | Isokinetic device | Knee                 | CON-TREX®                   | Kinetics              | SPM, Discreet    |
| Galindo-Martínez (2021) <sup>78</sup> | 23                     | Cycling                   | Cycling           | Hip, Knee, Ankle     | Vicon                       | Kinematics            | SPM              |
| Bini (2021) <sup>79</sup>             | 10                     | Cycling                   | Cycling           | Hip, Knee            | XSENS                       | Kinematics + Kinetics | SPM              |
| Park (2022) <sup>80</sup>             | 10                     | Cycling, Stand-up cycling | Stand-up cycling  | Hip, Knee, Ankle     | Motion Analysis + load cell | Kinematics + Kinetics | SPM+ Discreet    |
| Bertozzi (2022) <sup>84</sup>         | 11                     | Kayak                     | Kayak             | Hip, Knee, Ankle     | BTS bioengineering          | Kinematics            | SPM              |
| Klitgaard (2021) <sup>85</sup>        | 11                     | Kayak- ergometer          | Kayak             | Knee                 | XSENS                       | Kinematics            | SPM              |
| Callaghan (2019) <sup>87</sup>        | 9                      | Cricket                   | Cricket           | Knee                 | XSENS + Kistler             | Kinematics + Kinetics | SPM+ Discreet    |
| Wallace (2021) <sup>88</sup>          | 13                     | Dance                     | Dance             | Hip, Knee, Ankle     | Vicon + AMTI                | Kinematics + Kinetics | SPM+ Discreet    |
| Bissas (2022) <sup>86</sup>           | 16                     | Hurdling                  | Hurdling          | Hip, Knee, Ankle, CM | Sony + SIMI                 | Kinematics            | SPM+ Discreet    |
| Augustus (2017) <sup>82</sup>         | 9                      | Soccer                    | Instep kick       | Hip, Knee            | Vicon + Kistler             | Kinematics + Kinetics | SPM              |
| Iitake (2022) <sup>81</sup>           | 14                     | Soccer                    | Instep kicking    | Hip, Knee            | Vicon                       | Kinematics + Kinetics | SPM              |
| Atack (2019) <sup>83</sup>            | 33                     | Rugby                     | Place kicking     | Hip, Knee            | Vicon + Kistler             | Kinematics + Kinetics | SPM+ Discreet    |
| Schroeder (2020) <sup>89</sup>        | 16                     | Recreationally active     | Sidestep          | Hip, Knee, Ankle     | Vicon + AMTI                | Kinematics + Kinetics | SPM+ Discreet    |



**Table 5. SPM1d Uses in population after an ACL Injuries.**

| Study                               | Participants Details           |                                |                        | SPM Assessment            |                  |                        |                       |               |
|-------------------------------------|--------------------------------|--------------------------------|------------------------|---------------------------|------------------|------------------------|-----------------------|---------------|
|                                     | Number of Injured Participants | Number of Healthy Participants | Sport participation    | Activity                  | Joints           | Measurement Tools      | Kinetic/ Kinematic    | SPM/ Discreet |
| Garcia (2022) <sup>90</sup>         | 30                             | 15                             | N/A                    | Walking-Treadmill         | GRF              | Bertec                 | Kinetics              | SPM           |
| Neal (2022) <sup>91</sup>           | 35                             | N/A                            | N/A                    | Walking-Overground        | Knee             | Vicon + Bertec         | Kinematics + Kinetics | SPM+ Discreet |
| Oh (2022) <sup>92</sup>             | 15                             | 15                             | N/A                    | Walking-Overground        | Hip, Knee, Ankle | Kinect + AnyBody       | Kinetics              | SPM           |
| Johnson (2022) <sup>93</sup>        | 19                             | 9                              | N/A                    | Walking-Treadmill         | Knee             | Vicon + AMTI           | Kinematics + Kinetics | SPM           |
| Washabaugh (2022) <sup>94</sup>     | 15                             | N/A                            | N/A                    | Walking-Treadmill         | GRF              | Bertec                 | Kinetics              | SPM+ Discreet |
| Sole (2017) <sup>95</sup>           | 67                             | 32                             | Tegner scale = 9       | Stairs descent            | Knee             | Qualisys               | Kinematics            | SPM           |
| Sole (2022) <sup>96</sup>           | 31                             | N/A                            | Tegner scale = 9       | Jumping/ Landing          | Knee             | Motion Analysis + AMTI | Kinematics + Kinetics | SPM+ Discreet |
| Sole (2022) <sup>97</sup>           | 18                             | N/A                            | Tegner scale = 7       | Jumping/ Landing          | Knee             | Motion Analysis + AMTI | Kinetics              | SPM+ Discreet |
| Smeets (2020) <sup>98</sup>         | 21                             | 21                             | Varied                 | Jumping/ Landing          | Hip, Knee, Ankle | Vicon + AMTI           | Kinematics + Kinetics | SPM+ Discreet |
| Alejandra-Díaz (2022) <sup>99</sup> | 21                             | N/A                            | Athletes               | Jumping/ Landing          | GRF              | Vicon + AMTI           | Kinetics              | SPM           |
| King (2018) <sup>100</sup>          | 156                            | N/A                            | Multidirectional field | Jumping/ Landing          | Hip, Knee, Ankle | Vicon + AMTI           | Kinematics + Kinetics | SPM+ Discreet |
| Smale (2019) <sup>101</sup>         | 18                             | 18                             | Tegner scale = 6.9     | Jumping/ Landing, cutting | Hip, Knee, Ankle | Vicon + AMTI           | Kinematics + Kinetics | SPM+ Discreet |
| Miles (2022) <sup>102</sup>         | 78                             | N/A                            | Field sports           | Cutting                   | Knee             | Vicon + AMTI           | Kinematics + Kinetics | SPM+ Discreet |
| King (2018) <sup>103</sup>          | 156                            | N/A                            | Multidirectional field | Cutting                   | Hip, Knee, Ankle | Vicon + AMTI           | Kinematics + Kinetics | SPM+ Discreet |
| Alizadeh (2022) <sup>104</sup>      | 12                             | 68                             | Soccer                 | Isokinetic device         | Knee             | IsoMed 2000            | Kinetics              | SPM+ Discreet |
| Baumgart (2018) <sup>105</sup>      | 38                             | N/A                            | Team sport             | Isokinetic device         | Knee             | Biodex                 | Kinetics              | SPM           |
| Gillet (2022) <sup>106</sup>        | 186                            | N/A                            | Physically active      | Isokinetic device         | Knee             | CON-TREX               | Kinetics              | SPM           |
| Hart (2022) <sup>107</sup>          | 357                            | N/A                            | Field sports           | Isokinetic device         | Knee             | Cybex                  | Kinetics              | SPM+ Discreet |
| Read (2022) <sup>108</sup>          | 27                             | N/A                            | Soccer                 | Isokinetic device         | Knee             | Biodex                 | Kinetics              | SPM+ Discreet |
| Rogowski (2019) <sup>109</sup>      | 144                            | N/A                            | Varied                 | Isokinetic device         | Knee             | Contrex                | Kinetics              | SPM+ Discreet |
| Kocak (2023) <sup>110</sup>         | 17                             | N/A                            | Collegiate athletes    | Isokinetic device         | Knee             | Biodex                 | Kinetics              | SPM+ Discreet |

**Table 6. SPM1d in populations with ankle injuries.**

| Participants Details              |                                |                                |                         | SPM Assessment     |                  |                                 |                       |               |
|-----------------------------------|--------------------------------|--------------------------------|-------------------------|--------------------|------------------|---------------------------------|-----------------------|---------------|
| Study                             | Number of Injured Participants | Number of Healthy Participants | Sport participation     | Activity           | Joints           | Measurement Tools               | Kinetic/ Kinematic    | SPM/ Discreet |
| Ridder (2013) <sup>111</sup>      | 53                             | 24                             | Recreationally active   | Walking-Overground | Ankle            | Qualisys + AMTI                 | Kinematics            | SPM+ Discreet |
| Northeast (2018) <sup>112</sup>   | 18                             | 18                             | Team sports             | Walking-Overground | Hip, Knee, Ankle | Motion Analysis                 | Kinematics            | SPM+ Discreet |
| Moisan (2020) <sup>113</sup>      | 21                             | 21                             | N/A                     | Walking-Overground | Knee, Ankle      | Optotrak + Bertec               | Kinematics + Kinetics | SPM           |
| Fraser (2019) <sup>114</sup>      | 58                             | 22                             | Recreationally active   | Walking-Treadmill  | Ankle            | Ascension Technologies + Bertec | Kinematics            | SPM+ Discreet |
| Koldenhoven (2019) <sup>115</sup> | 18                             | 18                             | Physically active       | Walking-Treadmill  | Hip, Knee, Ankle | Vicon + Bertec                  | Kinematics + Kinetics | SPM+ Discreet |
| Dingenen (2017) <sup>116</sup>    | 15                             | 12                             | Recreationally active   | Walking-Overground | Ankle            | Vicon + AMTI                    | Kinematics            | SPM           |
| Koldenhoven (2022) <sup>117</sup> | 13                             | 13                             | Recreationally active   | Running-Treadmill  | Hip, Knee, Ankle | Vicon + Bertec                  | Kinematics + Kinetics | SPM+ Discreet |
| Wanner (2019) <sup>118</sup>      | 32                             | N/A                            | Athletes                | Running-Treadmill  | Ankle            | Qualisys + Bertec               | Kinematics            | SPM           |
| Deschamps (2016) <sup>119</sup>   | 15                             | 12                             | Recreationally active   | Running-Overground | Ankle            | Vicon + AMTI                    | Kinematics            | SPM           |
| Deschamps (2018) <sup>120</sup>   | 15                             | 12                             | N/A                     | Running-Overground | Ankle            | Vicon + AMTI                    | Kinematics            | SPM+ Discreet |
| Agres (2019) <sup>121</sup>       | 16                             | N/A                            | Participation in sports | Jumping/Landing    | Knee, Ankle      | Vicon                           | Kinematics            | SPM           |
| Ridder (2020) <sup>122</sup>      | 28                             | N/A                            | N/A                     | Jumping/Landing    | Ankle            | Qualisys + AMTI                 | Kinematics            | SPM+ Discreet |
| Ridder (2015) <sup>123</sup>      | 28                             | 28                             | Recreationally active   | Jumping/Landing    | Hip, Knee, Ankle | Qualisys + AMTI                 | Kinematics            | SPM           |
| Ridder (2015) <sup>124</sup>      | 58                             | 36                             | N/A                     | Jumping/Landing    | Ankle            | Qualisys + AMTI                 | Kinematics            | SPM           |
| Kawahara (2022) <sup>125</sup>    | 18                             | 18                             | Varied                  | Jumping/Landing    | Hip, Knee, Ankle | Motion Analysis + Kistler       | Kinematics            | SPM+ Discreet |
| Kunugi (2020) <sup>126</sup>      | 66                             | N/A                            | Soccer                  | Cutting            | Hip, Knee, Ankle | OptiTrack + Kistler             | Kinematics            | SPM           |

**Table 7. SPM1d in populations with hip related pain.**

| Study                          | Participants Details           |                                |                     | Activity           | SPM Assessment   |                   |                       |               |
|--------------------------------|--------------------------------|--------------------------------|---------------------|--------------------|------------------|-------------------|-----------------------|---------------|
|                                | Number of Injured Participants | Number of Healthy Participants | Sport participation |                    | Joints           | Measurement Tools | Kinetic/ Kinematic    | SPM/ Discreet |
| King (2019) <sup>127</sup>     | 88                             | N/A                            | Soccer              | Walking-Overground | Hip, Knee, Ankle | Vicon + AMTI      | Kinematics + Kinetics | SPM+ Discreet |
| Savage (2021) <sup>128</sup>   | 41                             | 24                             | N/A                 | Walking-Overground | Hip, Knee, Ankle | Vicon + AMTI      | Kinematics + Kinetics | SPM+ Discreet |
| Freemyer (2022) <sup>129</sup> | 9                              | 9                              | N/A                 | Walking-Treadmill  | Hip, Knee, Ankle | Vicon + AMTI      | Kinematics + Kinetics | SPM           |
| Naili (2023) <sup>130</sup>    | 19                             | N/A                            | N/A                 | Walking-Overground | Hip, Knee, Ankle | Vicon             | Kinematics            | SPM+ Discreet |
| Grant (2022) <sup>131</sup>    | 43                             | N/A                            | N/A                 | Walking-Overground | Hip              | Vicon + AMTI      | Kinematics + Kinetics | SPM+ Discreet |
| Scholes (2021) <sup>132</sup>  | 78                             | 38                             | Soccer              | Running-Overground | Hip, Knee, Ankle | Vicon + AMTI      | Kinematics + Kinetics | SPM           |
| Catelli (2021) <sup>133</sup>  | 10                             | 10                             | N/A                 | Stairs             | Hip              | Vicon + Bertec    | Kinematics + Kinetics | SPM           |
| Grosklos (2022) <sup>134</sup> | 36                             | 19                             | N/A                 | Jumping/Landing    | Hip, Knee, Ankle | Vicon + Bertec    | Kinematics + Kinetics | SPM+ Discreet |
| Catelli (2021) <sup>135</sup>  | 26                             | 13                             | N/A                 | Squat              | Hip              | Vicon + Bertec    | Kinematics + Kinetics | SPM           |

## References

1. Bezodis NE, Willwacher S, Salo AIT. The Biomechanics of the Track and Field Sprint Start: A Narrative Review. *Sports medicine (Auckland, N.Z.)* 2019; **49**(9):1345–64, doi:10.1007/s40279-019-01138-1.
2. Dix C, Arundale A, Silvers-Granelli H, Marmon A, Zarzycki R, Snyder-Mackler L. BIOMECHANICAL MEASURES DURING TWO SPORT-SPECIFIC TASKS DIFFERENTIATE BETWEEN SOCCER PLAYERS WHO GO ON TO ANTERIOR CRUCIATE LIGAMENT INJURY AND THOSE WHO DO NOT: A PROSPECTIVE COHORT ANALYSIS. *Int J Sports Phys Ther* 2020; **15**(6):928–35, doi:10.26603/ijsp20200928.
3. FRISTON K, ASHBURNER J, KIEBEL S, NICHOLS T, PENNY W (eds). *Statistical Parametric Mapping: The Analysis of Functional Brain Images*: Elsevier; 2007.
4. Pataky TC. Generalized n-dimensional biomechanical field analysis using statistical parametric mapping. *Journal of biomechanics* 2010; **43**(10):1976–82, doi:10.1016/j.jbiomech.2010.03.008.
5. Munn Z, Peters MDJ, Stern C, Tufanaru C, McArthur A, Aromataris E. Systematic review or scoping review? Guidance for authors when choosing between a systematic or scoping review approach. *BMC medical research methodology* 2018; **18**(1):143, doi:10.1186/s12874-018-0611-x.
6. Ouzzani M, Hammady H, Fedorowicz Z, Elmagarmid A. Rayyan-a web and mobile app for systematic reviews. *Systematic reviews* 2016; **5**(1):210, doi:10.1186/s13643-016-0384-4.
7. Tricco AC, Lillie E, Zarin W, O'Brien KK, Colquhoun H, Levac D, Moher D, Peters MDJ, Horsley T, Weeks L, Hempel S, Akl EA, Chang C, McGowan J, Stewart L, Hartling L, Aldcroft A, Wilson MG, Garritty C, Lewin S, Godfrey CM, Macdonald MT, Langlois EV, Soares-Weiser K, Moriarty J, Clifford T, Tunçalp Ö, Straus SE. PRISMA Extension for Scoping Reviews (PRISMA-ScR): Checklist and Explanation. *Annals of internal medicine* 2018; **169**(7):467–73, doi:10.7326/M18-0850.
8. Yona T, Cohen Eick G, Kamel N, Ovadia I, Fischer A. *One-Dimension Statistical Parametric Mapping for Lower Limb Biomechanical Analysis: A Scoping Review*: Open Science Framework; 2023.
9. Costa BL, Magalhães FA, Araújo VL, Richards J, Vieira FM, Souza TR, Trede R. Is there a dose-response of medial wedge insoles on lower limb biomechanics in people with pronated feet during walking and running? *Gait & posture* 2021; **90**:190–6, doi:10.1016/j.gaitpost.2021.09.163.
10. Chen H, Shao E, Sun D, Xuan R, Baker JS, Gu Y. Effects of footwear with different longitudinal bending stiffness on biomechanical characteristics and muscular mechanics of lower limbs in adolescent runners. *Frontiers in physiology* 2022; **13**:907016, doi:10.3389/fphys.2022.907016.
11. Besson T, Morio C, Millet GY, Rossi J. Influence of shoe drop on running kinematics and kinetics in female runners. *European journal of sport science* 2019; **19**(10):1320–7, doi:10.1080/17461391.2019.1603327.
12. Fu F, Guo L, Tang X, Wang J, Xie Z, Fekete G, Cai Y, Hu Q, Gu Y. Effect of the Innovative Running Shoes With the Special Midsole Structure on the Female Runners' Lower Limb Biomechanics. *Frontiers in bioengineering and biotechnology* 2022; **10**:866321, doi:10.3389/fbioe.2022.866321.
13. Nüesch C, Roos E, Egloff C, Pagenstert G, Mündermann A. The effect of different running shoes on treadmill running mechanics and muscle activity assessed using statistical parametric mapping (SPM). *Gait & posture* 2019; **69**:1–7, doi:10.1016/j.gaitpost.2019.01.013.
14. Shamsoddini A, Hollisaz MT. Biomechanics of running: A special reference to the comparisons of wearing boots and running shoes. *PloS one* 2022; **17**(6):e0270496, doi:10.1371/journal.pone.0270496.
15. Sinclair J, Brooks D, Taylor PJ, Liles NB. Effects of running in minimal, maximal and traditional running shoes: a musculoskeletal simulation exploration using statistical parametric mapping and Bayesian analyses. *Footwear Science* 2021; **13**(2):143–56, doi:10.1080/19424280.2021.1892834.
16. Sinclair J, Butters B, Stainton P. Acute Effects of Barefoot and Minimalist Footwear on Medial Tibiofemoral Compartment Loading During Running: A Statistical Parametric Mapping Approach. *Journal of human kinetics* 2018; **65**:35–44, doi:10.2478/hukin-2018-0037.
17. Tam N, Prins D, Divekar NV, Lamberts RP. Biomechanical analysis of gait waveform data: exploring differences between shod and barefoot running in habitually shod runners. *Gait & posture* 2017; **58**:274–9, doi:10.1016/j.gaitpost.2017.08.014.
18. Zhang M, Cui J, Liu H. Effect of Flat Running Shoes on Hip Kinematics in Male Recreational Runners. *IJERPH* 2022; **19**(24), doi:10.3390/ijerph192416473.

19. Trowell D, Fox A, Saunders N, Vicenzino B, Bonacci J. Effect of concurrent strength and endurance training on run performance and biomechanics: A randomized controlled trial. *Scandinavian journal of medicine & science in sports* 2022; **32**(3):543–58, doi:10.1111/sms.14092.
20. Masters A, Netto KJ, Brooker S, Hopper D, Liew B. Hip Taping Positively Alters Running Kinematics in Asymptomatic Females. *Int J Sports Med* 2018; **39**(14):1068–74, doi:10.1055/a-0741-7075.
21. Matias AB, Watari R, Taddei UT, Caravaggi P, Inoue RS, Thibes RB, Suda EY, Vieira MF, Sacco ICN. Effects of Foot-Core Training on Foot-Ankle Kinematics and Running Kinetics in Runners: Secondary Outcomes From a Randomized Controlled Trial. *Frontiers in bioengineering and biotechnology* 2022; **10**:890428, doi:10.3389/fbioe.2022.890428.
22. Alizadeh S, Mattes K. How anterior pelvic tilt affects the lower extremity kinematics during the late swing phase in soccer players while running: A time series analysis. *Human movement science* 2019; **66**:459–66, doi:10.1016/j.humov.2019.06.001.
23. Bennett HJ, Valenzuela KA, Lynn SK, Weinhandl JT. Foot Rotation Gait Modifications Affect Hip and Ankle, But Not Knee, Stance Phase Joint Reaction Forces During Running. *Journal of biomechanical engineering* 2021; **143**(2), doi:10.1115/1.4047994.
24. Mei Q, Gu Y, Xiang L, Baker JS, Fernandez J. Foot Pronation Contributes to Altered Lower Extremity Loading After Long Distance Running. *Frontiers in physiology* 2019; **10**:573, doi:10.3389/fphys.2019.00573.
25. Deschamps K, Eerdeken M, Peters H, Matricali GA, Staes F. Multi-segment foot kinematics during running and its association with striking patterns. *Sports biomechanics* 2022; **21**(1):71–84, doi:10.1080/14763141.2019.1645203.
26. Glassbrook DJ, Fuller JT, Alderson JA, Doyle TLA. Foot accelerations are larger than tibia accelerations during sprinting when measured with inertial measurement units. *Journal of sports sciences* 2020; **38**(3):248–55, doi:10.1080/02640414.2019.1692997.
27. Judson LJ, Churchill SM, Barnes A, Stone JA, Brookes IGA, Wheat J. Horizontal force production and multi-segment foot kinematics during the acceleration phase of bend sprinting. *Scandinavian journal of medicine & science in sports* 2019; **29**(10):1563–71, doi:10.1111/sms.13486.
28. Möhler F, Fadillioglu C, Stein T. Changes in spatiotemporal parameters, joint and CoM kinematics and leg stiffness in novice runners during a high-intensity fatigue protocol. *PloS one* 2022; **17**(4):e0265550, doi:10.1371/journal.pone.0265550.
29. Gao Z, Fekete G, Baker JS, Liang M, Xuan R, Gu Y. Effects of running fatigue on lower extremity symmetry among amateur runners: From a biomechanical perspective. *Frontiers in physiology* 2022; **13**:899818, doi:10.3389/fphys.2022.899818.
30. Takabayashi T, Edama M, Inai T, Kubo M. Gender differences in coordination variability between shank and rearfoot during running. *Human movement science* 2019; **66**:91–7, doi:10.1016/j.humov.2019.03.017.
31. Nishida K, Xu C, Gale T, Anderst W, Fu F. Symmetry and sex differences in knee kinematics and ACL elongation in healthy collegiate athletes during high-impact activities revealed through dynamic biplane radiography. *Journal of orthopaedic research official publication of the Orthopaedic Research Society* 2022; **40**(1):239–51, doi:10.1002/jor.25162.
32. Zhou W, Yin L, Jiang J, Zhang Y, Hsiao C-P, Chen Y, Mo S, Wang L. Surface effects on kinematics, kinetics and stiffness of habitual rearfoot strikers during running. *PloS one* 2023; **18**(3):e0283323, doi:10.1371/journal.pone.0283323.
33. Garcia MC, Lennon A, Bazett-Jones DM, Ford KR, Long JT, Taylor-Haas JA. Influence of hamstring flexibility on running kinematics in adolescent long-distance runners. *Gait & posture* 2022; **93**:107–12, doi:10.1016/j.gaitpost.2022.01.015.
34. Khajooei M, Quarmby A, Kaplick H, Mayer F, Engel T. An analysis of lower extremity kinematics in response to perturbations during running using statistical parametric mapping. *Journal of biomechanics* 2022; **143**:111276, doi:10.1016/j.jbiomech.2022.111276.
35. Liew BXW, Morris S, Netto K. Joint power and kinematics coordination in load carriage running: Implications for performance and injury. *Gait & posture* 2016; **47**:74–9, doi:10.1016/j.gaitpost.2016.04.014.

36. Fraeulin L, Maurer-Grubinger C, Holzgreve F, Groneberg DA, Ohlendorf D. Comparison of Joint Kinematics in Transition Running and Isolated Running in Elite Triathletes in Overground Conditions. *Sensors (Basel, Switzerland)* 2021; **21**(14), doi:10.3390/s21144869.
37. Uno Y, Ogasawara I, Konda S, Wakabayashi K, Miyakawa M, Nambo M, Umegaki K, Cheng H, Hashizume K, Nakata K. Effect of the foot-strike pattern on the sagittal plane knee kinetics and kinematics during the early phase of cutting movements. *Journal of biomechanics* 2022; **136**:111056, doi:10.1016/j.jbiomech.2022.111056.
38. Ogasawara I, Shimokochi Y, Mae T, Nakata K. Rearfoot strikes more frequently apply combined knee valgus and tibial internal rotation moments than forefoot strikes in females during the early phase of cutting maneuvers. *Gait & posture* 2020; **76**:364–71, doi:10.1016/j.gaitpost.2019.11.014.
39. Ogasawara I, Shimokochi Y, Konda S, Mae T, Nakata K. Effect of Rearfoot Strikes on the Hip and Knee Rotational Kinetic Chain During the Early Phase of Cutting in Female Athletes. *Sports medicine - open* 2021; **7**(1):75, doi:10.1186/s40798-021-00368-w.
40. Peel SA, Schroeder LE, Weinhandl JT. Effects of foot progression angle on knee mechanics during an anticipated cutting task: A statistical parametric mapping approach. *Journal of biomechanics* 2022; **130**:110842, doi:10.1016/j.jbiomech.2021.110842.
41. David S, Komnik I, Peters M, Funken J, Potthast W. Identification and risk estimation of movement strategies during cutting maneuvers. *Journal of science and medicine in sport* 2017; **20**(12):1075–80, doi:10.1016/j.jsams.2017.05.011.
42. Bedo BLS, Cesar GM, Moraes R, Mariano FP, Vieira LHP, Andrade VL, Santiago PRP. Influence of Side Uncertainty on Knee Kinematics of Female Handball Athletes During Sidestep Cutting Maneuvers. *Journal of applied biomechanics* 2021; **37**(3):188–95, doi:10.1123/jab.2020-0141.
43. Dutailis B, Opar DA, Pataký T, Timmins RG, Hickey JT, Maniar N. Trunk, pelvis and lower limb coordination between anticipated and unanticipated sidestep cutting in females. *Gait & posture* 2021; **85**:131–7, doi:10.1016/j.gaitpost.2020.12.011.
44. Whyte EF, Richter C, O'connor S, Moran KA. The effect of high intensity exercise and anticipation on trunk and lower limb biomechanics during a crossover cutting manoeuvre. *Journal of sports sciences* 2018; **36**(8):889–900, doi:10.1080/02640414.2017.1346270.
45. Whyte EF, Richter C, O'Connor S, Moran KA. Investigation of the Effects of High-Intensity, Intermittent Exercise and Unanticipation on Trunk and Lower Limb Biomechanics During a Side-Cutting Maneuver Using Statistical Parametric Mapping. *Journal of strength and conditioning research* 2018; **32**(6):1583–93, doi:10.1519/JSC.0000000000002567.
46. Zago M, David S, Bertozzi F, Brunetti C, Gatti A, Salaorni F, Tarabini M, Galvani C, Sforza C, Galli M. Fatigue Induced by Repeated Changes of Direction in Élite Female Football (Soccer) Players: Impact on Lower Limb Biomechanics and Implications for ACL Injury Prevention. *Frontiers in bioengineering and biotechnology* 2021; **9**:666841, doi:10.3389/fbioe.2021.666841.
47. Bedo BLS, Catelli DS, Lamontagne M, Moraes R, Pereira DR, Graça JB, Santiago PRP. Fatigue modifies hip and knee kinematics during single- and double-leg dynamic tasks: An investigation with female handball players. *Journal of sports sciences* 2022; **40**(17):1964–72, doi:10.1080/02640414.2022.2123506.
48. Liu Y, Lam W-K, Seglina I, Apps C. Does the Location of Shoe Upper Support on Basketball Shoes Influence Ground Reaction Force and Ankle Mechanics during Cutting Maneuvers? *Biology* 2022; **11**(5), doi:10.3390/biology11050743.
49. Sinclair J, Liles N, Taylor PJ, Glenn T. Effects of second-generation and indoor sports surfaces on knee joint kinetics and kinematics during 45° and 180° cutting manoeuvres, and exploration using statistical parametric mapping and Bayesian analyses. *Sport Sci Health* 2020; **16**(3):511–21, doi:10.1007/s11332-020-00633-7.
50. Sankey SP, Robinson MA, Vanrenterghem J. Whole-body dynamic stability in side cutting: Implications for markers of lower limb injury risk and change of direction performance. *Journal of biomechanics* 2020; **104**:109711, doi:10.1016/j.jbiomech.2020.109711.
51. Whyte EF, Richter C, O'Connor S, Moran KA. Effects of a dynamic core stability program on the biomechanics of cutting maneuvers: A randomized controlled trial. *Scandinavian journal of medicine & science in sports* 2018; **28**(2):452–62, doi:10.1111/sms.12931.

52. Weinhandl JT, Irmischer BS, Bennett HJ. The effects of sex and landing task on hip mechanics. *Computer methods in biomechanics and biomedical engineering* 2021; **24**(16):1819–27, doi:10.1080/10255842.2021.1921163.
53. Vanrenterghem J, Venables E, Pataky T, Robinson MA. The effect of running speed on knee mechanical loading in females during side cutting. *Journal of biomechanics* 2012; **45**(14):2444–9, doi:10.1016/j.jbiomech.2012.06.029.
54. Di Paolo S, Nijmeijer E, Bragonzoni L, Dingshoff E, Gokeler A, Benjaminse A. Comparing lab and field agility kinematics in young talented female football players: Implications for ACL injury prevention. *European journal of sport science* 2023; **23**(5):859–68, doi:10.1080/17461391.2022.2064771.
55. Thomas C, Dos'Santos T, Warmenhoven J, Jones PA. Between-Limb Differences During 180° Turns in Female Soccer Players: Application of Statistical Parametric Mapping. *Journal of strength and conditioning research* 2022; **36**(11):3136–42, doi:10.1519/JSC.0000000000004022.
56. Schroeder LE, Valenzuela KA, Zhang S, Orme JG, Weinhandl JT. Rounding the base: A lower extremity biomechanical analysis in softball players. *International Journal of Sports Science & Coaching* 2021; **16**(6):1322–31, doi:10.1177/17479541211008275.
57. Cassiolas G, Di Paolo S, Marchiori G, Grassi A, Della Villa F, Bragonzoni L, Visani A, Giavaresi G, Fini M, Zaffagnini S, Lopomo NF. Knee Joint Contact Forces during High-Risk Dynamic Tasks: 90° Change of Direction and Deceleration Movements. *Bioengineering (Basel, Switzerland)* 2023; **10**(2), doi:10.3390/bioengineering10020179.
58. Xu D, Jiang X, Cen X, Baker JS, Gu Y. Single-Leg Landings Following a Volleyball Spike May Increase the Risk of Anterior Cruciate Ligament Injury More Than Landing on Both-Legs. *Applied Sciences* 2021; **11**(1):130, doi:10.3390/app11010130.
59. Xu D, Cen X, Wang M, Rong M, István B, Baker JS, Gu Y. Temporal Kinematic Differences between Forward and Backward Jump-Landing. *IJERPH* 2020; **17**(18), doi:10.3390/ijerph17186669.
60. Kunugi S, Koumura T, Myotsuzono R, Masunari A, Yoshida N, Miyakawa S, Mukai N. Directions of single-leg landing affect multi-segment foot kinematics and dynamic postural stability in male collegiate soccer athletes. *Gait & posture* 2020; **80**:285–91, doi:10.1016/j.gaitpost.2020.06.007.
61. Hogg JA, Vanrenterghem J, Ackerman T, Nguyen A-D, Ross SE, Schmitz RJ, Shultz SJ. Temporal kinematic differences throughout single and double-leg forward landings. *Journal of biomechanics* 2020; **99**:109559, doi:10.1016/j.jbiomech.2019.109559.
62. Liu X, Huang H, Li X, Li J, Shi H, Wang A. Effects of Video Task With a High-Level Exercise Illustration on Knee Movements in Male Volleyball Spike Jump. *Frontiers in psychology* 2021; **12**:644188, doi:10.3389/fpsyg.2021.644188.
63. Zhou H, Chen C, Xu D, Ugbole UC, Baker JS, Gu Y. Biomechanical Characteristics between Bionic Shoes and Normal Shoes during the Drop-Landing Phase: A Pilot Study. *IJERPH* 2021; **18**(6), doi:10.3390/ijerph18063223.
64. Whyte EF, Kennelly P, Milton O, Richter C, O'Connor S, Moran KA. The effects of limb dominance and a short term, high intensity exercise protocol on both landings of the vertical drop jump: implications for the vertical drop jump as a screening tool. *Sports biomechanics* 2018; **17**(4):541–53, doi:10.1080/14763141.2017.1371215.
65. Martonick NJ, Chun Y, Krumpl L, Bailey JP. Lower Extremity Kinematic Waveform Analysis During a Single Leg Drop Task - Including a Single Subject Design. *Int J Sports Phys Ther* 2022; **17**(7):1271–81, doi:10.26603/001c.55538.
66. Simpson JD, Stewart EM, Rendos NK, Cosio-Lima L, Wilson SJ, Macias DM, Chander H, Knight AC. Anticipating ankle inversion perturbations during a single-leg drop landing alters ankle joint and impact kinetics. *Human movement science* 2019; **66**:22–30, doi:10.1016/j.humov.2019.03.015.
67. Zhou H, Xu D, Chen C, Ugbole UC, Baker JS, Gu Y. Analysis of Different Stop-Jumping Strategies on the Biomechanical Changes in the Lower Limbs. *Applied Sciences* 2021; **11**(10):4633, doi:10.3390/app11104633.
68. Estevan I, Monfort-Torres G, Farana R, Zahradnik D, Jandacka D, García-Massó X. Children's Single-Leg Landing Movement Capability Analysis According to the Type of Sport Practiced. *IJERPH* 2020; **17**(17), doi:10.3390/ijerph17176414.
69. Li X, Adrien N, Baker JS, Mei Q, Gu Y. Novice Female Exercisers Exhibited Different Biomechanical Loading Profiles during Full-Squat and Half-Squat Practice. *Biology* 2021; **10**(11), doi:10.3390/biology10111184.

70. Kipp K, Kim H, Wolf WI. Muscle-Specific Contributions to Lower Extremity Net Joint Moments While Squatting With Different External Loads. *Journal of strength and conditioning research* 2022; **36**(2):324–31, doi:10.1519/JSC.0000000000003874.
71. Kristiansen M, Rasmussen GHF, Sloth ME, Voigt M. Inter- and intra-individual variability in the kinematics of the back squat. *Human movement science* 2019; **67**:102510, doi:10.1016/j.humov.2019.102510.
72. Sayers MGL, Hosseini Nasab SH, Bachem C, Taylor WR, List R, Lorenzetti S. The effect of increasing heel height on lower limb symmetry during the back squat in trained and novice lifters. *BMC sports science, medicine & rehabilitation* 2020; **12**:42, doi:10.1186/s13102-020-00191-y.
73. Maddox EU, Bennett HJ. Effects of External Load on Sagittal and Frontal Plane Lower Extremity Biomechanics During Back Squats. *Journal of biomechanical engineering* 2021; **143**(5), doi:10.1115/1.4049747.
74. Gao L, Lu Z, Liang M, Baker JS, Gu Y. Influence of Different Load Conditions on Lower Extremity Biomechanics during the Lunge Squat in Novice Men. *Bioengineering (Basel, Switzerland)* 2022; **9**(7), doi:10.3390/bioengineering9070272.
75. Zhang Q, Morel B, Trama R, Hautier CA. Influence of Fatigue on the Rapid Hamstring/Quadriceps Force Capacity in Soccer Players. *Frontiers in physiology* 2021; **12**:627674, doi:10.3389/fphys.2021.627674.
76. Alhammoud M, Morel B, Hansen C, Wilson M, Mecca R, Nael E, Hautier C. Discipline and Sex Differences in Angle-specific Isokinetic Analysis in Elite Skiers. *Int J Sports Med* 2019; **40**(5):317–30, doi:10.1055/a-0850-0016.
77. Oranchuk DJ, Diewald SN, McGrath JW, Nelson AR, Storey AG, Cronin JB. Kinetic and kinematic profile of eccentric quasi-isometric loading. *Sports biomechanics* 2021:1–14, doi:10.1080/14763141.2021.1890198.
78. Galindo-Martínez A, López-Valenciano A, Albaladejo-García C, Vallés-González JM, Elvira JLL. Changes in the Trunk and Lower Extremity Kinematics Due to Fatigue Can Predispose to Chronic Injuries in Cycling. *IJERPH* 2021; **18**(7), doi:10.3390/ijerph18073719.
79. Bini R. Influence of saddle height in 3D knee loads commuter cyclists: A statistical parametric mapping analysis. *Journal of sports sciences* 2021; **39**(3):275–88, doi:10.1080/02640414.2020.1816289.
80. Park S, Roh J, Hyeong J, Kim S. Effect of crank length on biomechanical parameters and muscle activity during standing cycling. *Journal of sports sciences* 2022; **40**(2):185–94, doi:10.1080/02640414.2021.1982516.
81. Iitake T, Hioki M, Takahashi H, Nunome H. Sex difference in soccer instep kicking. *Journal of sports sciences* 2022; **40**(20):2217–24, doi:10.1080/02640414.2022.2139881.
82. Augustus S, Mundy P, Smith N. Support leg action can contribute to maximal instep soccer kick performance: an intervention study. *Journal of sports sciences* 2017; **35**(1):89–98, doi:10.1080/02640414.2016.1156728.
83. Atack AC, Trewartha G, Bezodis NE. A joint kinetic analysis of rugby place kicking technique to understand why kickers achieve different performance outcomes. *Journal of biomechanics* 2019; **87**:114–9, doi:10.1016/j.jbiomech.2019.02.020.
84. Bertozzi F, Porcelli S, Marzorati M, Pilotto AM, Galli M, Sforza C, Zago M. Whole-body kinematics during a simulated sprint in flat-water kayakers. *European journal of sport science* 2022; **22**(6):817–25, doi:10.1080/17461391.2021.1930190.
85. Klitgaard KK, Hauge C, Oliveira AS, Heinen F. A kinematic comparison of on-ergometer and on-water kayaking. *European journal of sport science* 2021; **21**(10):1375–84, doi:10.1080/17461391.2020.1831617.
86. Bissas A, Paradisis GP, Hanley B, Merlino S, Walker J. Kinematic and Temporal Differences Between World-Class Men's and Women's Hurdling Techniques. *Frontiers in sports and active living* 2022; **4**:873547, doi:10.3389/fspor.2022.873547.
87. Callaghan SJ, Lockie RG, Andrews WA, Yu W, Chipchase RF, Nimphius S. The Effects of an Eight over Cricket Bowling Spell upon Pace Bowling Biomechanics and Performance within Different Delivery Lengths. *Sports (Basel, Switzerland)* 2019; **7**(9), doi:10.3390/sports7090200.
88. Wallace K, Kalogeropoulou S, Lamb P. The time-continuous association between turnout and axial joint moments in the competitive Irish dance 'fly' landing. *Sports biomechanics* 2021:1–10, doi:10.1080/14763141.2021.2016927.
89. Schroeder LE, Peel SA, Leverenz BH, Weinhandl JT. Type of unanticipated stimulus affects lower extremity kinematics and kinetics during sidestepping. *Journal of sports sciences* 2021; **39**(6):618–28, doi:10.1080/02640414.2020.1837481.



90. Garcia SA, Brown SR, Koje M, Krishnan C, Palmieri-Smith RM. Gait asymmetries are exacerbated at faster walking speeds in individuals with acute anterior cruciate ligament reconstruction. *Journal of orthopaedic research official publication of the Orthopaedic Research Society* 2022; **40**(1):219–30, doi:10.1002/jor.25117.
91. Neal K, Williams JR, Alfayyadh A, Capin JJ, Khandha A, Manal K, Snyder-Mackler L, Buchanan TS. Knee joint biomechanics during gait improve from 3 to 6 months after anterior cruciate ligament reconstruction. *Journal of orthopaedic research official publication of the Orthopaedic Research Society* 2022; **40**(9):2025–38, doi:10.1002/jor.25250.
92. Oh J, Ripic Z, Signorile JF, Andersen MS, Kuenze C, Letter M, Best TM, Eltoukhy M. Monitoring joint mechanics in anterior cruciate ligament reconstruction using depth sensor-driven musculoskeletal modeling and statistical parametric mapping. *Medical engineering & physics* 2022; **103**:103796, doi:10.1016/j.medengphy.2022.103796.
93. Johnson AK, Brown SR, Palmieri-Smith RM, Krishnan C. Functional Resistance Training After Anterior Cruciate Ligament Reconstruction Improves Knee Angle and Moment Symmetry During Gait: A Randomized Controlled Clinical Trial. *Arthroscopy the journal of arthroscopic & related surgery official publication of the Arthroscopy Association of North America and the International Arthroscopy Association* 2022; **38**(11):3043–55, doi:10.1016/j.arthro.2022.04.021.
94. Washabaugh EP, Brown SR, Palmieri-Smith RM, Krishnan C. Functional Resistance Training Differentially Alters Gait Kinetics After Anterior Cruciate Ligament Reconstruction: A Pilot Study. *Sports health* 2022:19417381221104042, doi:10.1177/19417381221104042.
95. Sole G, Pataky T, Tengman E, Häger C. Analysis of three-dimensional knee kinematics during stair descent two decades post-ACL rupture - Data revisited using statistical parametric mapping. *Journal of electromyography and kinesiology official journal of the International Society of Electrophysiological Kinesiology* 2017; **32**:44–50, doi:10.1016/j.jelekin.2016.12.005.
96. Sole G, Lamb P, Pataky T, Pathak A, Klima S, Navarre P, Hammer N. Immediate and six-week effects of wearing a knee sleeve following anterior cruciate ligament reconstruction on knee kinematics and kinetics: a cross-over laboratory and randomised clinical trial. *BMC Musculoskelet Disord* 2022; **23**(1):560, doi:10.1186/s12891-022-05488-2.
97. Sole G, Pataky T, Hammer N, Lamb P. Can a knee sleeve influence ground reaction forces and knee joint power during a step-down hop in participants following anterior cruciate ligament reconstruction? A secondary analysis. *PLoS one* 2022; **17**(12):e0272677, doi:10.1371/journal.pone.0272677.
98. Smeets A, Vanrenterghem J, Staes F, Vandenneucker H, Claes S, Verschueren S. Are Anterior Cruciate Ligament-reconstructed Athletes More Vulnerable to Fatigue than Uninjured Athletes? *Medicine and science in sports and exercise* 2020; **52**(2):345–53, doi:10.1249/MSS.0000000000002143.
99. Alejandra Díaz M, Smeets A, Hagen M, Sankey SP, Verschueren S, Vanrenterghem J. Postural balance strategies during landing at the moment of return-to-sports after anterior cruciate ligament reconstruction. *Journal of biomechanics* 2022; **145**:111381, doi:10.1016/j.jbiomech.2022.111381.
100. King E, Richter C, Franklyn-Miller A, Daniels K, Wadey R, Moran R, Strike S. Whole-body biomechanical differences between limbs exist 9 months after ACL reconstruction across jump/landing tasks. *Scandinavian journal of medicine & science in sports* 2018; **28**(12):2567–78, doi:10.1111/sms.13259.
101. Smale KB, Flaxman TE, Alkjaer T, Simonsen EB, Krogsgaard MR, Benoit DL. Anterior cruciate ligament reconstruction improves subjective ability but not neuromuscular biomechanics during dynamic tasks. *Knee surgery, sports traumatology, arthroscopy official journal of the ESSKA* 2019; **27**(2):636–45, doi:10.1007/s00167-018-5189-7.
102. Miles JJ, McGuigan PM, King E, Daniels KAJ. Biomechanical asymmetries differ between autograft types during unplanned change of direction after ACL reconstruction. *Scandinavian journal of medicine & science in sports* 2022; **32**(8):1236–48, doi:10.1111/sms.14166.
103. King E, Richter C, Franklyn-Miller A, Daniels K, Wadey R, Jackson M, Moran R, Strike S. Biomechanical but not timed performance asymmetries persist between limbs 9 months after ACL reconstruction during planned and unplanned change of direction. *Journal of biomechanics* 2018; **81**:93–103, doi:10.1016/j.jbiomech.2018.09.021.
104. Alizadeh S, Sarvestan J, Svoboda Z, Alaei F, Linduška P, Ataabadi PA. Hamstring and ACL injuries impacts on hamstring-to-quadriceps ratio of the elite soccer players: A retrospective study. *Physical therapy in sport official*

- Journal of the Association of Chartered Physiotherapists in Sports Medicine* 2022; **53**:97–104, doi:10.1016/j.ptsp.2021.12.001.
105. Baumgart C, Welling W, Hoppe MW, Freiwald J, Gokeler A. Angle-specific analysis of isokinetic quadriceps and hamstring torques and ratios in patients after ACL-reconstruction. *BMC sports science, medicine & rehabilitation* 2018; **10**:23, doi:10.1186/s13102-018-0112-6.
106. Gillet B, Blache Y, Rogowski I, Vigne G, Capel O, Sonnery-Cottet B, Fayard J-M, Thauinat M. Isokinetic Strength After ACL Reconstruction: Influence of Concomitant Anterolateral Ligament Reconstruction. *Sports health* 2022; **14**(2):176–82, doi:10.1177/19417381211005405.
107. Hart LM, Izri E, King E, Daniels KAJ. Angle-specific analysis of knee strength deficits after ACL reconstruction with patellar and hamstring tendon autografts. *Scandinavian journal of medicine & science in sports* 2022; **32**(12):1781–90, doi:10.1111/sms.14229.
108. Read PJ, Trama R, Racinais S, McAuliffe S, Klauznicer J, Alhammoud M. Angle specific analysis of hamstrings and quadriceps isokinetic torque identify residual deficits in soccer players following ACL reconstruction: a longitudinal investigation. *Journal of sports sciences* 2022; **40**(8):871–7, doi:10.1080/02640414.2021.2022275.
109. Rogowski I, Vigne G, Blache Y, Thauinat M, Fayard J-M, Monnot D, Sonnery-Cottet B. DOES THE GRAFT USED FOR ACL RECONSTRUCTION AFFECT THE KNEE MUSCULAR STRENGTH RATIO AT SIX MONTHS POSTOPERATIVELY? *Intl J Sports Phys Ther* 2019; **14**(4):546–53, doi:10.26603/ijspt20190546.
110. Kocak UZ, Knurr KA, Cobian DG, Heiderscheidt BC. Beyond peak torque: Longitudinal analysis of angle-specific isokinetic knee torques in collegiate athletes post-ACLR. *Physical therapy in sport official journal of the Association of Chartered Physiotherapists in Sports Medicine* 2023; **61**:11–9, doi:10.1016/j.ptsp.2023.02.004.
111. Ridder R de, Willems T, Vanrenterghem J, Robinson M, Pataky T, Roosen P. Gait kinematics of subjects with ankle instability using a multisegmented foot model. *Medicine and science in sports and exercise* 2013; **45**(11):2129–36, doi:10.1249/MSS.0b013e31829991a2.
112. Northeast L, Gautrey CN, Bottoms L, Hughes G, Mitchell ACS, Greenhalgh A. Full gait cycle analysis of lower limb and trunk kinematics and muscle activations during walking in participants with and without ankle instability. *Gait & posture* 2018; **64**:114–8, doi:10.1016/j.gaitpost.2018.06.001.
113. Moisan G, Mainville C, Descarreaux M, Cantin V. Kinematic, kinetic and electromyographic differences between young adults with and without chronic ankle instability during walking. *Journal of electromyography and kinesiology official journal of the International Society of Electrophysiological Kinesiology* 2020; **51**:102399, doi:10.1016/j.jelekin.2020.102399.
114. Fraser JJ, Hart JM, Saliba SF, Park JS, Tumperi M, Hertel J. Multisegmented ankle-foot kinematics during gait initiation in ankle sprains and chronic ankle instability. *Clinical biomechanics (Bristol, Avon)* 2019; **68**:80–8, doi:10.1016/j.clinbiomech.2019.05.017.
115. Koldenhoven RM, Hart J, Saliba S, Abel MF, Hertel J. Gait kinematics & kinetics at three walking speeds in individuals with chronic ankle instability and ankle sprain copers. *Gait & posture* 2019; **74**:169–75, doi:10.1016/j.gaitpost.2019.09.010.
116. Dingenen B, Deschamps K, Delchambre F, van Peer E, Staes FF, Matricali GA. Effect of taping on multi-segmental foot kinematic patterns during walking in persons with chronic ankle instability. *Journal of science and medicine in sport* 2017; **20**(9):835–40, doi:10.1016/j.jsams.2017.04.004.
117. Koldenhoven RM, Hart J, Abel MF, Saliba S, Hertel J. Running gait biomechanics in females with chronic ankle instability and ankle sprain copers. *Sports biomechanics* 2022; **21**(4):447–59, doi:10.1080/14763141.2021.1977378.
118. Wanner P, Schmautz T, Kluge F, Eskofier B, Pfeifer K, Steib S. Ankle angle variability during running in athletes with chronic ankle instability and copers. *Gait & posture* 2019; **68**:329–34, doi:10.1016/j.gaitpost.2018.11.038.
119. Deschamps K, Dingenen B, Pans F, van Bavel I, Matricali GA, Staes F. Effect of taping on foot kinematics in persons with chronic ankle instability. *Journal of science and medicine in sport* 2016; **19**(7):541–6, doi:10.1016/j.jsams.2015.07.015.
120. Deschamps K, Matricali GA, Dingenen B, Boeck J de, Bronselaer S, Staes F. Foot and ankle kinematics in chronic ankle instability subjects using a midfoot strike pattern when running, including influence of taping. *Clinical biomechanics (Bristol, Avon)* 2018; **54**:1–7, doi:10.1016/j.clinbiomech.2018.02.016.

121. Agres AN, Chrysanthou M, Raffalt PC. The Effect of Ankle Bracing on Kinematics in Simulated Sprain and Drop Landings: A Double-Blind, Placebo-Controlled Study. *Am J Sports Med* 2019; **47**(6):1480–7, doi:10.1177/0363546519837695.
122. Ridder R de, Willems T, Vanrenterghem J, Verrelst R, Blaiser C de, Roosen P. Taping Benefits Ankle Joint Landing Kinematics in Subjects With Chronic Ankle Instability. *Journal of Sport Rehabilitation* 2020; **29**(2):162–7, doi:10.1123/jsr.2018-0234.
123. Ridder R de, Willems T, Vanrenterghem J, Robinson MA, Roosen P. Lower limb landing biomechanics in subjects with chronic ankle instability. *Medicine and science in sports and exercise* 2015; **47**(6):1225–31, doi:10.1249/MSS.0000000000000525.
124. Ridder R de, Willems T, Vanrenterghem J, Robinson MA, Palmans T, Roosen P. Multi-segment foot landing kinematics in subjects with chronic ankle instability. *Clinical biomechanics (Bristol, Avon)* 2015; **30**(6):585–92, doi:10.1016/j.clinbiomech.2015.04.001.
125. Kawahara D, Koshino Y, Watanabe K, Akimoto M, Ishida T, Kasahara S, Samukawa M, Tohyama H. Lower limb kinematics during single leg landing in three directions in individuals with chronic ankle instability. *Physical therapy in sport official journal of the Association of Chartered Physiotherapists in Sports Medicine* 2022; **57**:71–7, doi:10.1016/j.ptsp.2022.07.011.
126. Kunugi S, Koumura T, Myotsuzono R, Masunari A, Yoshida N, Miyakawa S, Mukai N. Ankle laxity affects ankle kinematics during a side-cutting task in male collegiate soccer athletes without perceived ankle instability. *Physical therapy in sport official journal of the Association of Chartered Physiotherapists in Sports Medicine* 2020; **46**:89–96, doi:10.1016/j.ptsp.2020.08.012.
127. King MG, Heerey JJ, Schache AG, Semciw AI, Middleton KJ, Sritharan P, Lawrenson PR, Crossley KM. Lower limb biomechanics during low- and high-impact functional tasks differ between men and women with hip-related groin pain. *Clinical biomechanics (Bristol, Avon)* 2019; **68**:96–103, doi:10.1016/j.clinbiomech.2019.06.001.
128. Savage TN, Saxby DJ, Pizzolato C, Diamond LE, Murphy NJ, Hall M, Spiers L, Eyles J, Killen BA, Suwarganda EK, Dickenson EJ, Griffin D, Fary C, O'Donnell J, Molnar R, Randhawa S, Reichenbach S, Tran P, Wrigley TV, Bennell KL, Hunter DJ, Lloyd DG. Trunk, pelvis and lower limb walking biomechanics are similarly altered in those with femoroacetabular impingement syndrome regardless of cam morphology size. *Gait & posture* 2021; **83**:26–34, doi:10.1016/j.gaitpost.2020.10.002.
129. Freemyer B, Durkin R, Crawford S, Beeler D, Stickley C. Preoperative and Postoperative Walking Gait in Women With Acetabular Labral Tears and Femoroacetabular Impingement Syndrome. *Journal of athletic training* 2022; **57**(8):780–7, doi:10.4085/1062-6050-0026.21.
130. Naili JE, Brekke AF, Simonsen MB, Hirata RP, Overgaard S, Holsgaard-Larsen A. Change in functional biomechanics following a targeted exercise intervention in patients with acetabular retroversion and femoroacetabular impingement syndrome. *Gait & posture* 2023; **100**:96–102, doi:10.1016/j.gaitpost.2022.11.017.
131. Grant TM, Diamond LE, Pizzolato C, Savage TN, Bennell K, Dickenson EJ, Eyles J, Foster NE, Hall M, Hunter DJ, Lloyd DG, Molnar R, Murphy NJ, O'Donnell J, Singh P, Spiers L, Tran P, Saxby DJ. Comparison of Walking Biomechanics After Physical Therapist-Led Care or Hip Arthroscopy for Femoroacetabular Impingement Syndrome: A Secondary Analysis From a Randomized Controlled Trial. *Am J Sports Med* 2022; **50**(12):3198–209, doi:10.1177/03635465221120388.
132. Scholes MJ, Crossley KM, King MG, Schache AG, Kemp JL, Semciw AI, Sritharan P, Heerey JJ, Mentiplay BF. Running biomechanics in football players with and without hip and groin pain. A cross-sectional analysis of 116 sub-elite players. *Physical therapy in sport official journal of the Association of Chartered Physiotherapists in Sports Medicine* 2021; **52**:312–21, doi:10.1016/j.ptsp.2021.10.011.
133. Catelli DS, Bedo BLS, Beaulé PE, Lamontagne M. Pre- and postoperative in silico biomechanics in individuals with cam morphology during stair tasks. *Clinical biomechanics (Bristol, Avon)* 2021; **86**:105387, doi:10.1016/j.clinbiomech.2021.105387.
134. Groszklos M, Lewis CL, Jochimsen K, Perry J, Ellis TJ, Vasileff WK, Elwood M, Di Stasi S. Females with hip-related pain display altered lower limb mechanics compared to their healthy counterparts in a drop jump task. *Clinical biomechanics (Bristol, Avon)* 2022; **100**:105812, doi:10.1016/j.clinbiomech.2022.105812.

135. Catelli DS, Kowalski E, Beaulé PE, Lamontagne M. Muscle and Hip Contact Forces in Asymptomatic Men With Cam Morphology During Deep Squat. *Frontiers in sports and active living* 2021; **3**:716626, doi:10.3389/fspor.2021.716626.
136. Houston A, Fong DTP, Bennett AN, Walters V, Barker-Davies RM. Biomechanical differences between military patients with patellar tendinopathy and asymptomatic controls during single-leg squatting and gait - A statistical parametric mapping study. *Clinical biomechanics (Bristol, Avon)* 2021; **90**:105514, doi:10.1016/j.clinbiomech.2021.105514.
137. Pieters D, Witvrouw E, Wezenbeek E, Schuermans J. Value of isokinetic strength testing for hamstring injury risk assessment: Should the 'strongest' mates stay ashore? *European journal of sport science* 2022; **22**(2):257–68, doi:10.1080/17461391.2020.1851774.
138. Robinson MA, Vanrenterghem J, Pataky TC. Sample size estimation for biomechanical waveforms: Current practice, recommendations and a comparison to discrete power analysis. *Journal of biomechanics* 2021; **122**:110451, doi:10.1016/j.jbiomech.2021.110451.
139. Pataky TC. Power1D: a Python toolbox for numerical power estimates in experiments involving one-dimensional continua. *PeerJ Computer Science* 2017; **3**:e125, doi:10.7717/peerj-cs.125.

## Appendix 1. Search Strategy for the different Search Engines

### 1.1. Embase

'statistical parametric mapping':ti,ab,kw AND (knee:ti,ab,kw OR hip:ti,ab,kw OR ankle:ti,ab,kw)

### 1.2. PubMed

statistical parametric mapping[Title/Abstract] AND (knee[Title/Abstract] OR hip[Title/Abstract] OR ankle[Title/Abstract])

### 1.3. ProQuest

noft(statistical parametric mapping AND (knee OR hip OR ankle))

Additional limits - Document type: Article; Language: English

### 1.4. Web of Science

((TI=(statistical parametric mapping AND ( knee OR hip OR ankle ))) OR AB=(statistical parametric mapping AND ( knee OR hip OR ankle ))) OR AK=(statistical parametric mapping AND ( knee OR hip OR ankle ))

## Appendix 2. SPM1d in populations with Other Sport-Related Injuries.

| Study                          | Participants Details           |                                |                     |                           | SPM Assessment |                   |                       |               |
|--------------------------------|--------------------------------|--------------------------------|---------------------|---------------------------|----------------|-------------------|-----------------------|---------------|
|                                | Number of Injured Participants | Number of Healthy Participants | Sport participation | Activity                  | Joints         | Measurement Tools | Kinetic/ Kinematic    | SPM/ Discreet |
| Houston (2021) <sup>136</sup>  | 25                             | 24                             | Army                | Single-leg squat, walking | Hip, Knee      | Vicon + AMTI      | Kinematics + Kinetics | SPM           |
| Alizadeh (2022) <sup>104</sup> | 31                             | 68                             | Soccer              | Isokinetic device         | Knee           | IsoMed 2000       | Kinetics              | SPM+ Discreet |
| Pieters (2022) <sup>137</sup>  | 56                             | 60                             | Soccer              | Isokinetic device         | Hip, Knee      | Biodex            | Kinetics              | SPM           |
